# Supplementary material for: Insights into the role of an Fe–N active site in the oxygen reduction reaction on carbon-supported supramolecular catalysts
Source: Royal Society of Chemistry journal article supplement (doi:10.1039/c9ra09301j), 2020-01-01
Supplement: c9ra09301j1.pdf [file c9ra09301j1.pdf]

## Insights into the role of Fe-N active site in the oxygen reduction reaction on carbon-supported supramolecule catalysts

Lin Gu<sup>a</sup>, Yunyun Dong<sup>b, \*</sup>, Yan Zhang<sup>a</sup>, Bo Wang<sup>b</sup>, Qing Yuan<sup>b</sup>, Hongmei Du<sup>a</sup>, Jinsheng Zhao<sup>a, \*</sup>

<sup>a</sup>Shandong Key Laboratory of Chemical Energy Storage and Novel Cell Technology, Liaocheng University, Liaocheng, 252059, P.R China.

<sup>b</sup>College of Chemistry and Chemical Engineering, Liaocheng University, Liaocheng, 252059, P.R. China.

The characterization of PPYTZ polymer

The <sup>1</sup>H NMR ( $\delta$  ppm) and IR spectroscopy of PPYTZ polymer are shown in Fig. 1S. Wherein, the detailed analysis of the <sup>1</sup>H NMR (Fig. 1Sa) is as follows  $\delta$ : <sup>1</sup>H NMR(400 MHz, (CD<sub>3</sub>)<sub>2</sub>SO,  $\delta$  ppm)  $\delta$ =13.71(s, 7H), 12.77(s, 10H), 11.61(s, 11H), 8.42(t, 12H), 8.32(m, 23H), 5.81(s, 6H), 3.06(q, 1H), 1.34(s, 1H), 1.22(d, 3H), 1.16(t, 1H). In addition, Fig. 1Sb shows the data of the IR: the peak at 1692 cm<sup>-1</sup> is due to the CO-NH stretching vibration [1], the bands at 1538 cm<sup>-1</sup> and 1457 cm<sup>-1</sup> are attributed to stretching vibration of pyridine ring (C=C and C=N) [2], the peak at 1296 cm<sup>-1</sup> is due to N-N stretching vibration of triazole ring, the bands in the region 907-644 cm<sup>-1</sup> are assigned to C-H in-of-plane bending vibration of aromatic ring [3]. Therefore, the above data analysis shows that the PPYTZ polymer has been successfully prepared

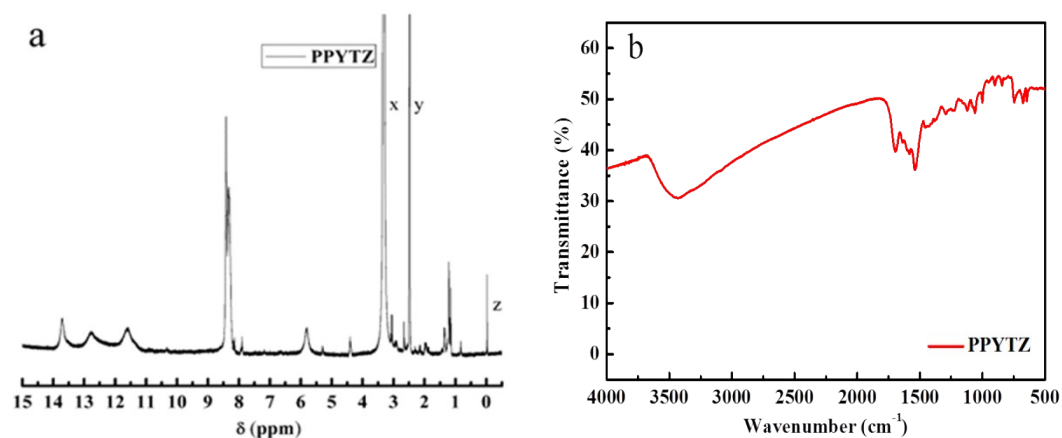

Fig. 1S <sup>1</sup>H NMR (a) and IR (b) of PPYTZ polymer

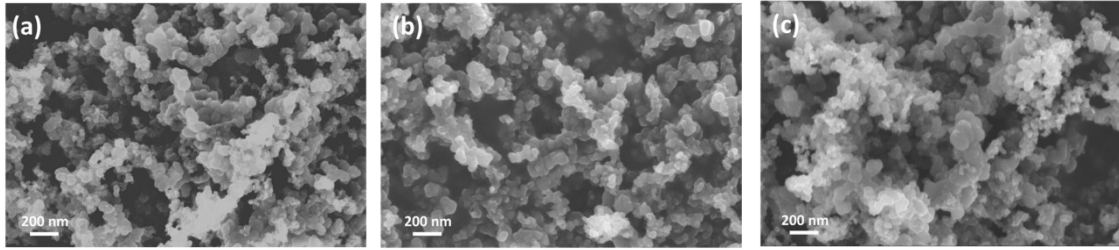

**Fig. 2S** SEM images of (a) Vulcan XC-72, (b) PPYTZ/C and (c) PPYTZ-Fe/C.

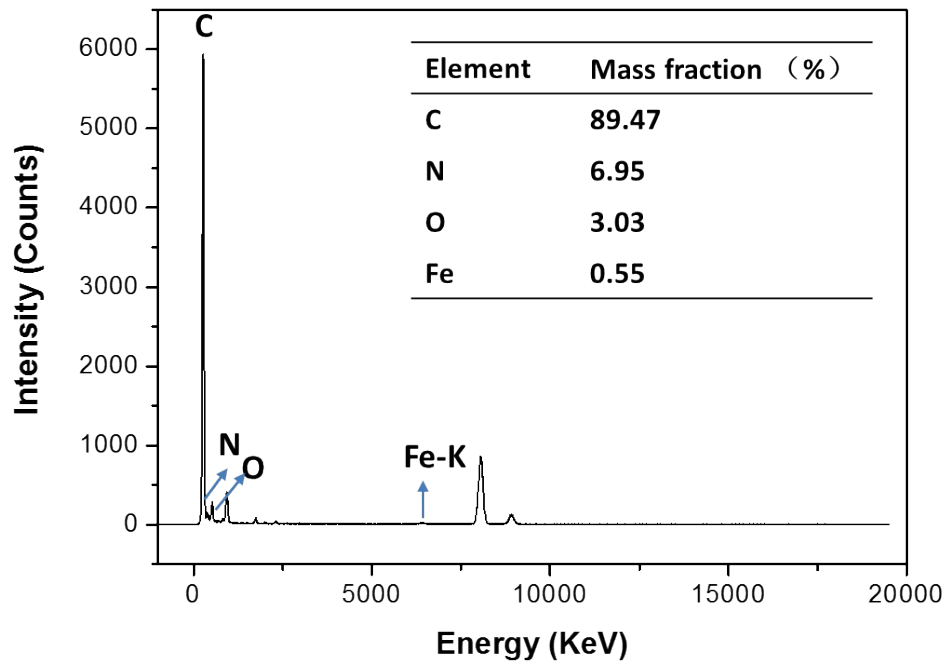

**Fig. 3S** TEM-EDS image of PPYTZ-Fe/C.

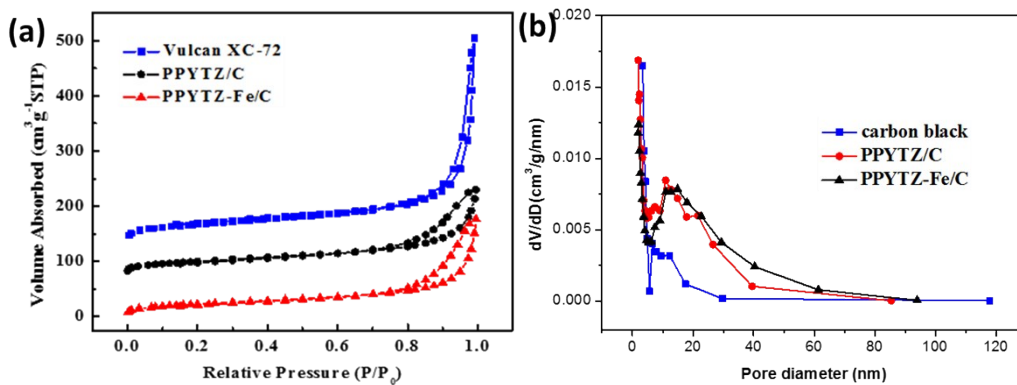

**Fig. 4S**  $\text{N}_2$  adsorption/desorption isotherms and BJH pore size distribution data of Vulcan XC-72, PPYTZ/C and PPYTZ-Fe/C composite.

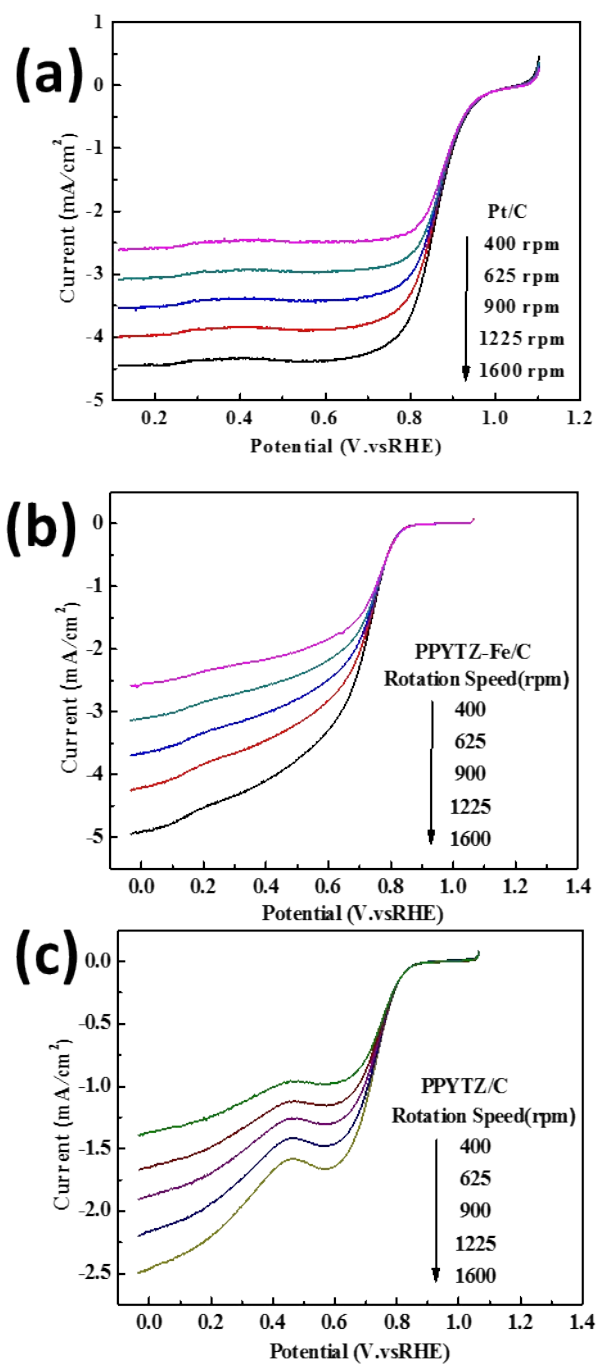

**Fig. 5S** (a) Pt/C, (b) PPYTZ/C and (c) PPYTZ-Fe/C polarization curves at different speeds in 0.1M KOH . Scan rate: 10 mV s<sup>-1</sup>.

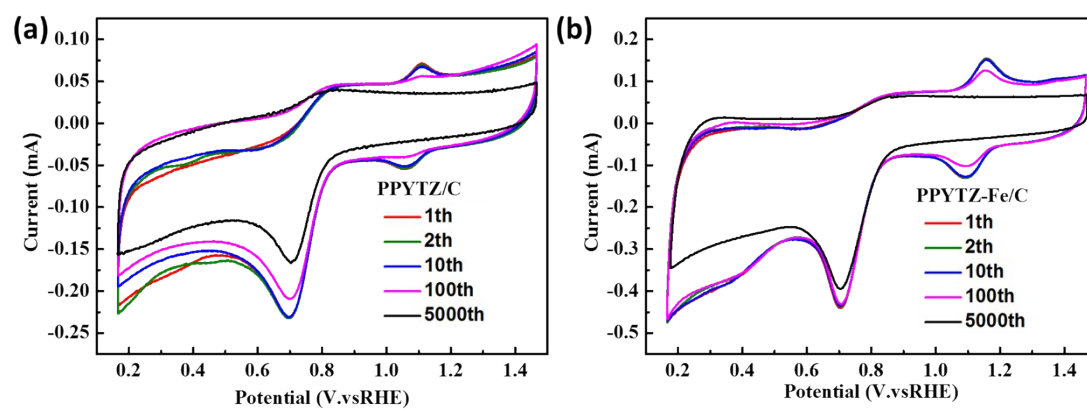

**Fig. 6S** 5000th CV curves of (a) PPYTZ/C and (b) PPYTZ-Fe/C in O<sub>2</sub> saturated KOH (0.1M) solution.
